# Supplementary material
Source: ML conference proceedings conference paper supplement (https://openreview.net/forum?id=EcDO5EXFdH)

# TNB101\_MICRO AUTOENC

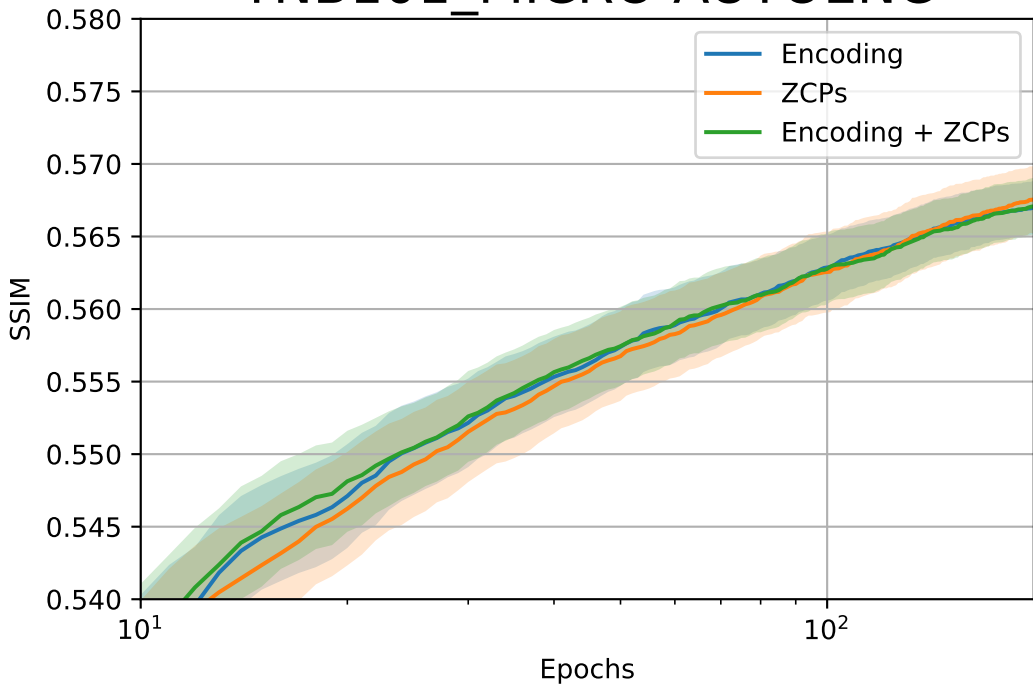

Supplement: supplementary_material [file attachment]

# NB201 CF100

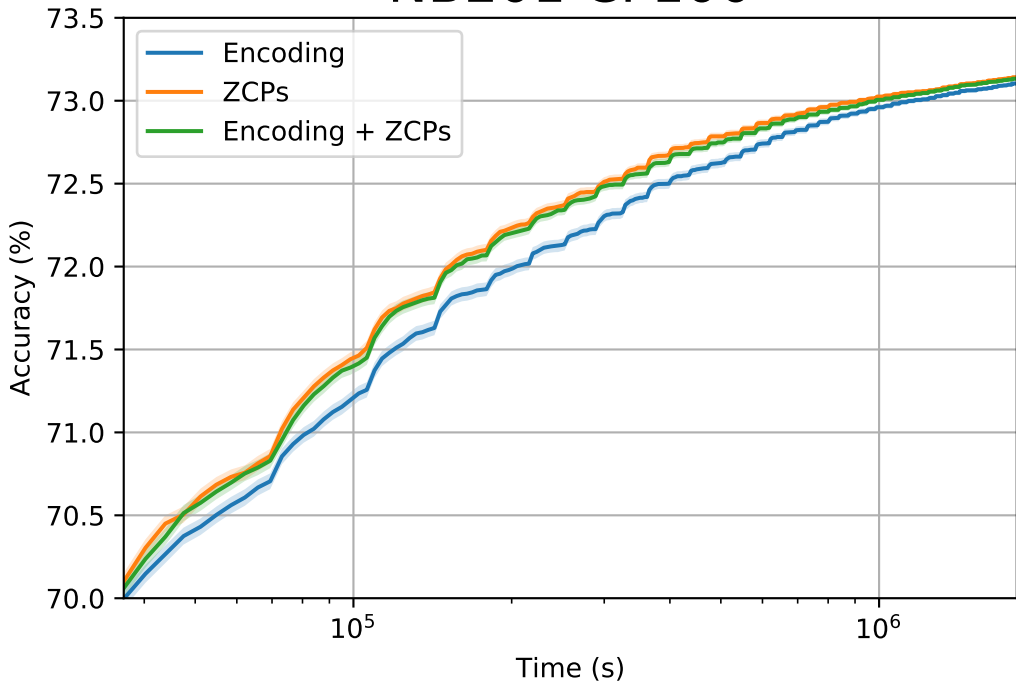

Supplement: supplementary_material [file attachment]

# NB301 CF10

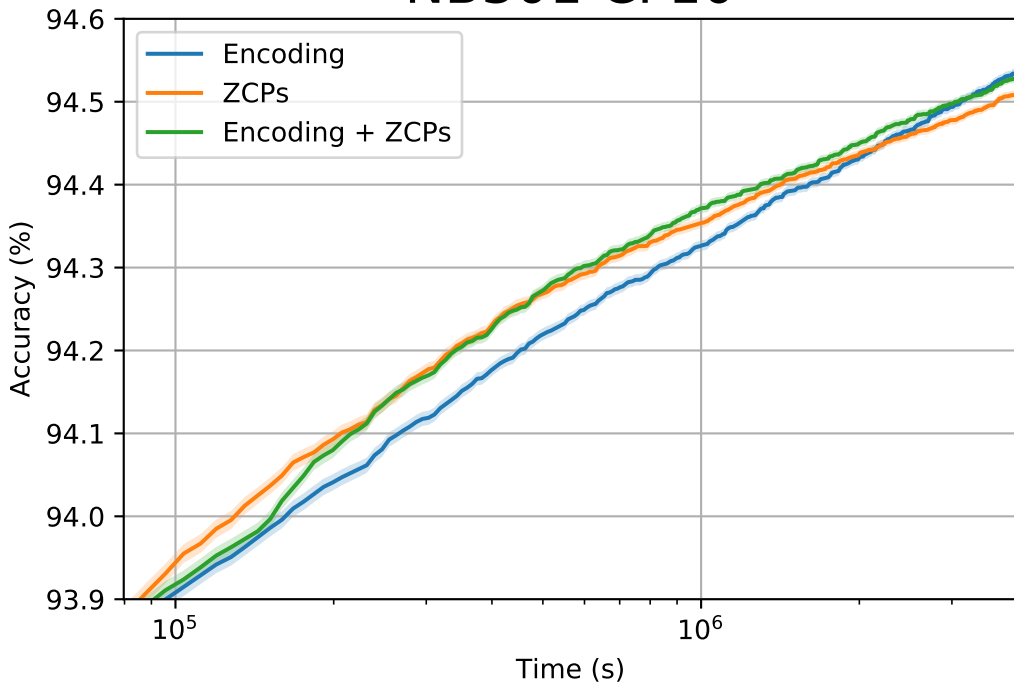

Supplement: supplementary_material [file attachment]

# TNB101\_MICRO ROOM

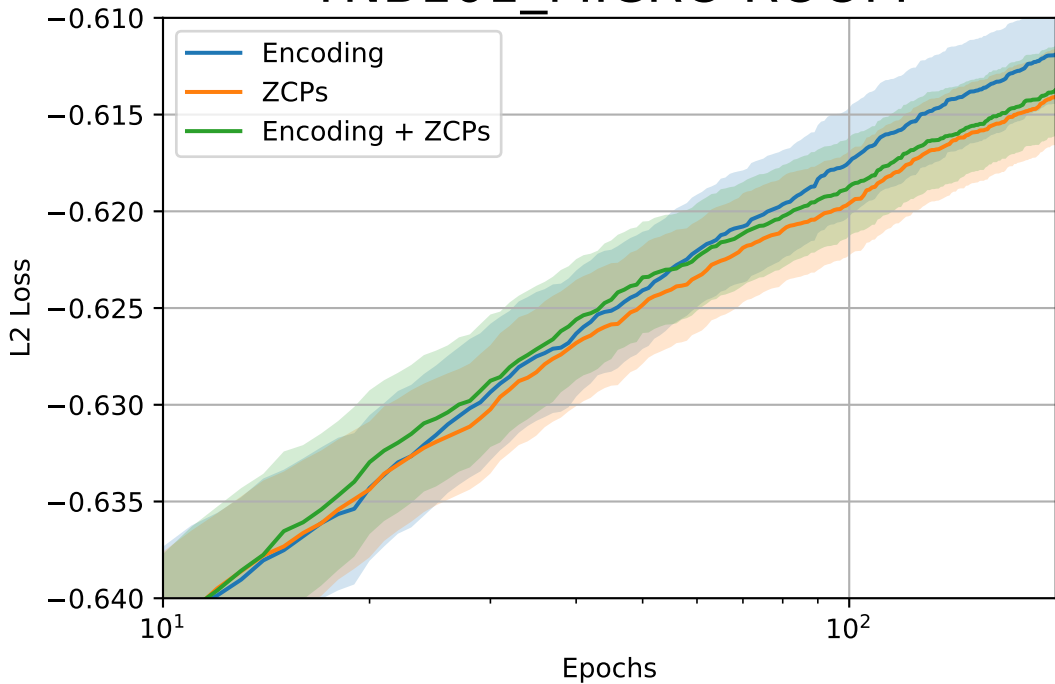

Supplement: supplementary_material [file attachment]

# TNB101\_MICRO OBJECT

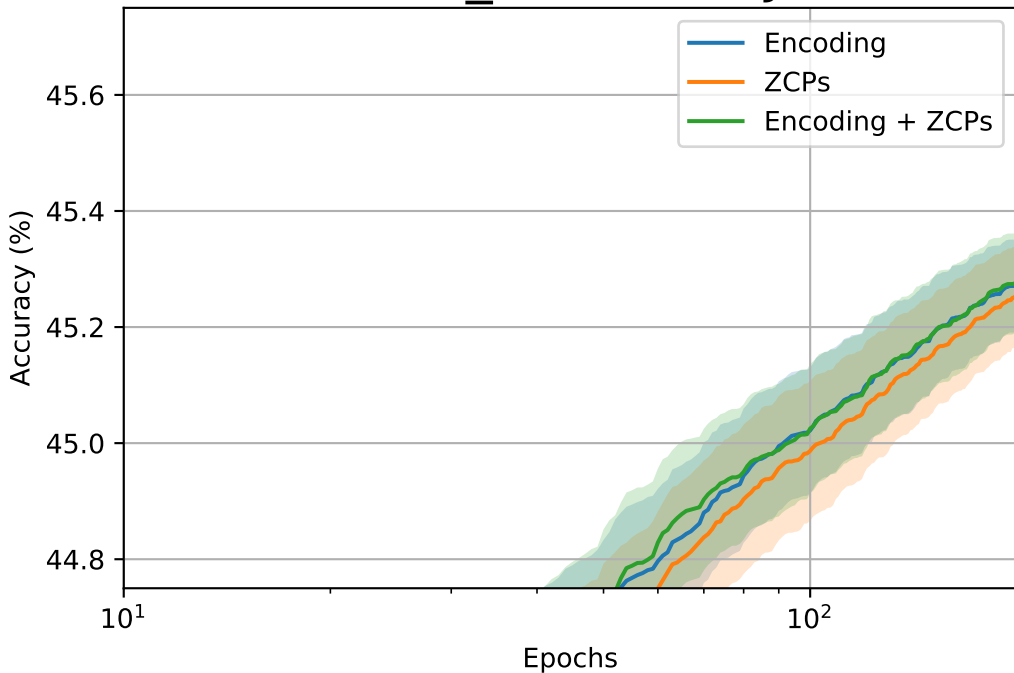

Supplement: supplementary_material [file attachment]

# TNB101\_MICRO SCENE

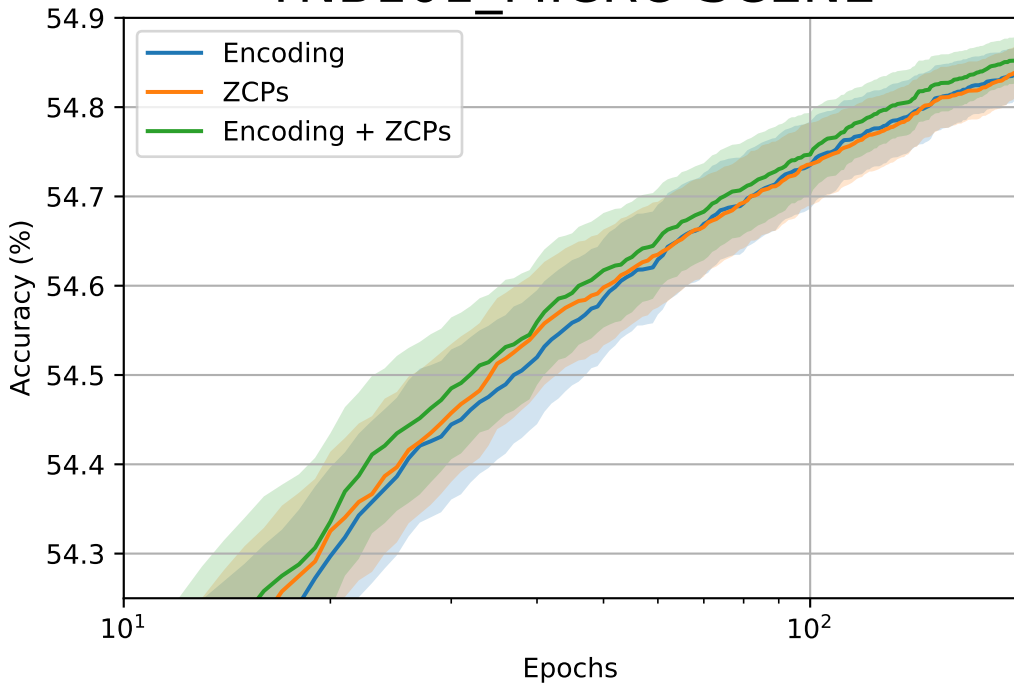

Supplement: supplementary_material [file attachment]

# NB201 IMGNT

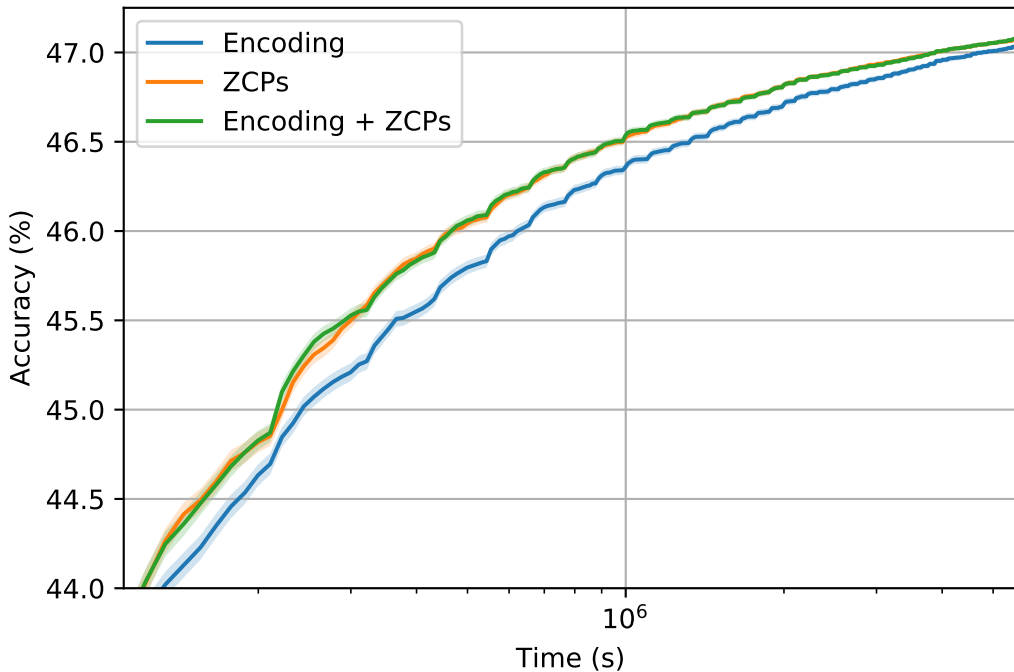

Supplement: supplementary_material [file attachment]

# TNB101\_MICRO SEGMENT

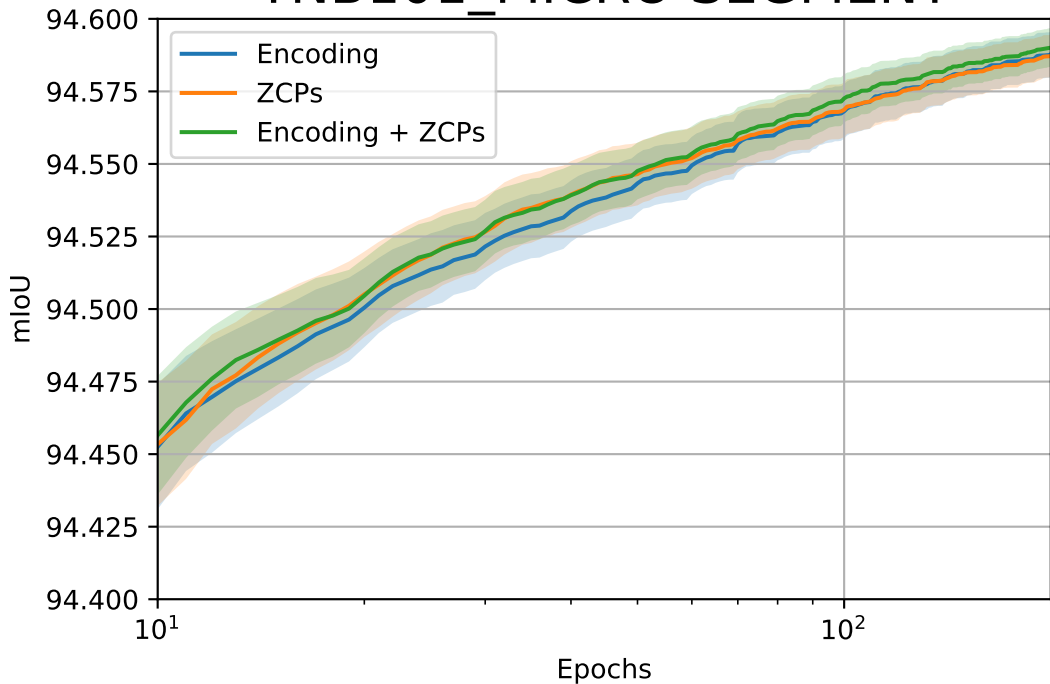

Supplement: supplementary_material [file attachment]

# NB201 CF10

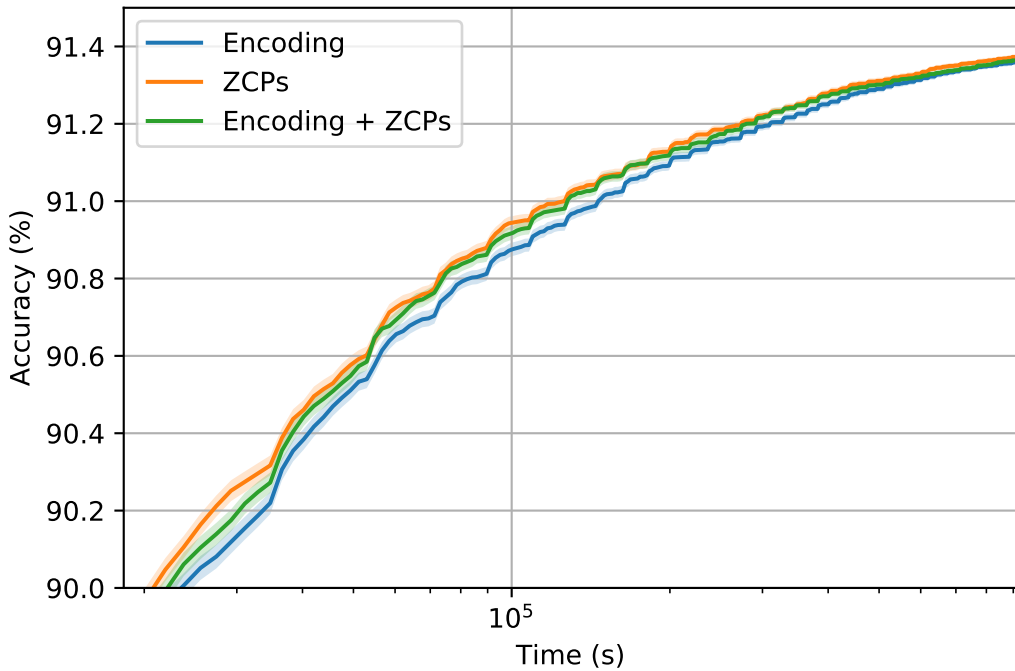

Supplement: supplementary_material [file attachment]

# TNB101\_MICRO NORMAL

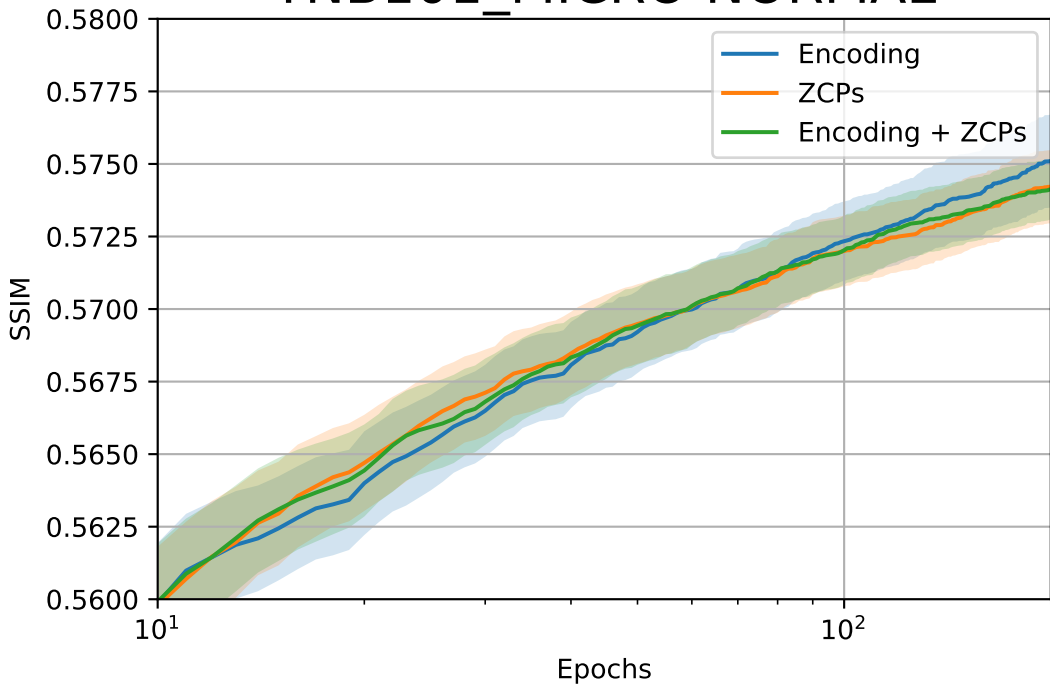

Supplement: supplementary_material [file attachment]

# TNB101\_MICRO JIGSAW

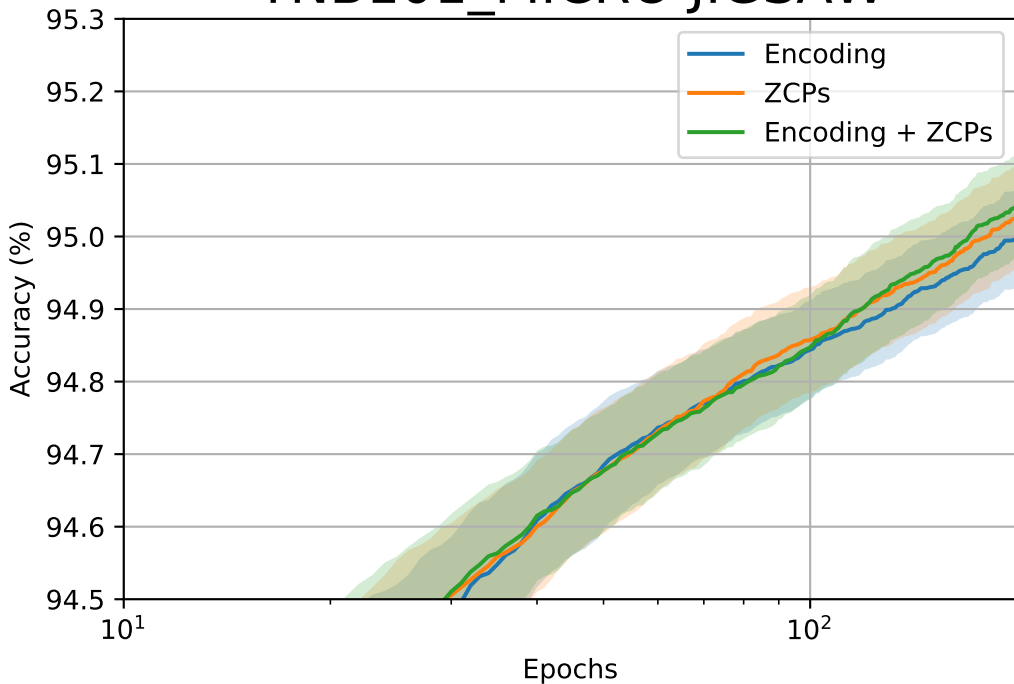

Supplement: supplementary_material [file attachment]
